# Supplementary material for: PIXAL: A Physics-Informed Explainable Machine Learning Architecture for Greenland Ice Albedo Modeling
Source: Copernicus journal article supplement (doi:10.5194/egusphere-2025-6143), 2026-02-17
Supplement: Supplementary file [file egusphere-2025-6143-AC3-supplement.pdf]

# Review 1 of Antwerpen et al 2026, TC Discussion

Note to editor and referees: we decided to revise our previous replies, please use the following responses.

The manuscript presents a Machine Learning approach to calculate the spatial and temporal evolution of albedo in the bare ice zone on the SW part of the Greenland Ice Sheet. PIXAL is trained on MODIS albedo and compared to the method for calculating albedo in MAR, after calibrating the MAR method to the same MODIS data. While I found the interpretation of the SHAP a little difficult to follow and I was missing some discussion on the incident angle/slope dependence on MODIS data, the manuscript is clear and well presented and I can recommend publishing after some minor revisions. I hope the authors will take this work further in the future and implement PIXAL or something similar in MAR. We would like to thank Referee #1 for their thorough comments and helpful suggestions. We appreciate the effort it took to review our manuscript and are confident the manuscript will be improved after we address these comments.

I understand and agree with your concern regarding the clarity of the SHAP method. I addressed this in your comment about line 338 and changed that sentence to better clarify how SHAP works in our workflow. Further, I agree with your concern about the incident angle/slope dependence on MODIS data. I address this point in your comment about line 380-386 and added text to the manuscript to discuss this.

Here are my line by line comments:

48: maybe add to the sentence something like: [...] resulting in a net mass loss *and exposure of the bare ice surface every year*.

Thank you for the suggestion, I added “[...] and the potential exposure of the bare ice surface.”

67: I think Cryoconite is a collective term for dust and algae, and not a type of particle in itself?

You're right, I removed cryoconite from the list.

88: Consider adding a *thus*: [...] which can lead to underestimates of surface melting and *thus* sea level rise [...]

Done.

225-227: Maybe I missed it somehow, but for the albedo prediction in the XGBoost you use all the MAR output listed in line 140-146, except Albedo and cloud cover. But what about: surface melt and shortwave upward radiation. These must also be dependent on the MAR

albedo. But I am unsure how this affects the results, could you maybe add a sentence about this?

Shortwave upward radiation is included in the list in 140-146. I added the following sentences to clarify why surface melt is not included in the list: “While surface melt is available as an output variable of MAR, we did not include this variable in this list because it strongly correlates with runoff. We chose to include runoff over surface melt because we want to capture the potential redistribution processes of LACs through runoff and the consequent impacts on ice albedo.”

Figure 2 c): Why do you think there is this spatial difference in the performance? I wonder if the difference you see is due to slope? There must be an issue with MODIS seeing albedo differently depending on slope. I think it would be easy to compare that here – although maybe out of the scope for this study.

That’s an interesting point. The largest XGBoost-MODIS discrepancies are found in areas with a low slope, so this would likely not be the cause. The sun and satellite viewing angles could be a culprit at these high latitudes though. Testing this is unfortunately out of scope for this study, but I added the following sentences to section 5.2:

“Moreover, some spatial variability is present in the performance of XGBoost compared to MODIS (Fig. 2c). This discrepancy may be partly due to spatial variability in the number of valid MODIS data points, which can lead to a bias in the mean observed ice albedo in areas with fewer valid data points (Fig. 2a). Lastly, MODIS exhibits a positive albedo bias above 70° N due to sun and satellite viewing angles at high latitudes (Alexander et al., 2014). The largest differences between XGBoost and MODIS albedo are found near this latitude, potentially explaining the XGBoost-MODIS discrepancy as a positive bias from MODIS rather than an underestimate from XGBoost.”

338: I am not sure I understand this: “In other words, the SHAP value shows how much the ice albedo prediction increases or decreases due to each individual feature relative to the mean ice albedo”. When you say ice albedo prediction increases do you then mean that it is the performance of the albedo prediction that gets better?

With an increase/decrease in ice albedo prediction I mean that the absolute value of the predicted albedo is higher/lower. In this sentence I do not relate it to the performance, just the actual albedo value. I changed the sentence to: “In other words, a feature’s SHAP value represents the extent to which that variable pushes the prediction above or below that mean.”

340-342: I don’t understand why you determine the surface height and slope to be the primary and then the climatic to be the secondary. To me it looks like temperature, shortwave incoming and wind is a better predictor than slope and surface height. Temperature in particular looks unambiguous. But maybe it relates to the fact that I have not really understood what you are comparing in the SHAP? I think a few sentences should be added to clarify this.

I agree that this section is somewhat confusing. According to the results in Fig. 5, surface height, temperature and slope are the most impactful drivers, since the features are ordered by the mean absolute SHAP values (how much each variable changes the albedo prediction). The other variables also impact the albedo prediction, but less significantly. We describe this in more detail in Section 5.1. I've adjusted the wording to:

“The topographic features of surface height and slope, as well as temperature, are the key drivers of ice albedo. Radiative and atmospheric features are important additional drivers. The significance and impact of each variable listed in Fig. 5 is described in more detail in Section 5.1.”

I have also adjusted the abstract and the conclusion to account for this new wording.

367-374: This is all correct, but maybe add some discussion here on what does that mean for results from PIXAL if used for future runs?

Thank you for the great suggestion. We address this issue in the limitations section in L462-469. I added the following sentence to point to this discussion:

“The impact of these effects on the performance of PIXAL is further discussed in Section 5.2.”

380-386: As mentioned above, I think that MODIS albedo is likely affected by the slope, giving a somehow skewed picture of actual albedo e.g. Wang and Zender (2010) in “MODIS snow albedo bias at high solar zenith angles relative to theory and to *in situ* observations in Greenland” (<https://doi.org/10.1016/j.rse.2009.10.014>). I am missing bit of discussion on this.

I added this sentence: “Note that the MODIS-derived albedo may be affected by high solar zenith angles (SZA)  $>55^\circ$  (Wang and Zender, 2010; Alexander et al., 2014). This may introduce a negative albedo bias, especially in areas with a high ice surface slope.”

426-230: I was looking forward to hearing your thoughts about the albedo bias as mentioned above. To me this seems like an obvious next step and I am looking forward to see your results! In this study it would be interesting to see how often MAR albedo based on PIXAL would have to be recalibrated.

This is a great suggestion and we are excited about this next step too! Unfortunately, this approach is outside of the scope of this manuscript. We cannot confidently comment on the impact or number of iterations required to achieve a desired accuracy without testing the approach. I added the following sentence to this section to address the question of number of iterations required for this approach:

“While this iterate-update approach is likely required before permanent embedding of PIXAL in MAR or other models can be considered, testing this is unfortunately outside of the scope of this study. We therefore cannot confidently comment on the impact of this approach, nor on the number of iterations required to reach a desired accuracy. We look forward to applying this method in a future study.”

440-450: Again I am missing some discussion on MAR and incident angle / slope  
This is addressed in the comments above about lines 380-386 and figure 2c.
